# Supplementary material for: First report of naturally infected Aedes aegypti with chikungunya virus genotype ECSA in the Americas
Source: PLoS Negl Trop Dis. 2017 Jun 14;11(6):e0005630. doi: 10.1371/journal.pntd.0005630 (PMC5470658; doi:10.1371/journal.pntd.0005630)
Supplement: S2 Table — The values in bold correspond to the identity value and the values in italic correspond to the number of polymorphic sites between the sequences. (XLSX) [file pntd.0005630.s002.xlsx]

## Sheet: Plan1
	WA_HM045816_SN_1966	WA_HM045798_SN_1966	ECSA_HM045823_AO_1962	ECSA_KP164570_BRBA_2014	ECSA_KP164569_BRBA_2014	ECSA_KU940225_BRBA_2015	KY055011_BRSE_2016	ECSA_KJ796852_TH_2009	ASIAN_FN295483_MY_2006	ASIAN_FN295484_MY_2006
WA_HM045816_SN_1966	-	99.4899	85.5123	85.3781	85.3691	85.387	85.3333	85.2349	84.2506	84.2416
WA_HM045798_SN_1966	57	-	85.5839	85.4676	85.4586	85.4586	85.4228	85.3065	84.34	84.3311
ECSA_HM045823_AO_1962	1619	1611	-	98.7293	98.7204	98.7025	98.6488	97.915	94.2998	94.2729
ECSA_KP164570_BRBA_2014	1634	1624	142	-	99.9911	99.9732	99.9195	97.387	93.8702	93.8434
ECSA_KP164569_BRBA_2014	1635	1625	143	1	-	99.9642	99.9105	97.3781	93.8613	93.8345
ECSA_KU940225_BRBA_2015	1633	1625	145	3	4	-	99.9105	97.3602	93.8434	93.8166
KY055011_BRSE_2016	1639	1629	151	9	10	10	-	97.3244	93.8166	93.7897
ECSA_KJ796852_TH_2009	1650	1642	233	292	293	295	299	-	93.915	93.8881
ASIAN_FN295483_MY_2006	1760	1750	637	685	686	688	691	680	-	99.9642
ASIAN_FN295484_MY_2006	1761	1751	640	688	689	691	694	683	4	-
